# Supplementary material for: PtPdCu cubic nanoframes as electrocatalysts for methanol oxidation reaction
Source: Royal Society of Chemistry journal article supplement (doi:10.1039/d1ce00710f), 2021-01-01
Supplement: d1ce00710f1.pdf [file d1ce00710f1.pdf]

## Supporting information

### **PtPdCu cubic nanoframes as electrocatalysts for methanol oxidation reaction**

Wen Liu, Peng Wang, and Zhenghua Wang\*

*Key Laboratory of Functional Molecular Solids, Ministry of Education, College of  
Chemistry and Materials Science, Anhui Normal University, Wuhu 241000, P. R. China*

\*Corresponding author. E-mail: zhwang@ahnu.edu.cn

**Table S1** Comparison of the electrocatalytic performances of the catalysts in this work and references.

| Catalysts                    | ECSA<br>[m <sup>2</sup> g <sup>-1</sup> <sub>Pt</sub> ] | Mass activity                            | Ref.      |
|------------------------------|---------------------------------------------------------|------------------------------------------|-----------|
| Hexameric octahedral PtPdCu  | -                                                       | 3.47 mA cm <sup>-2</sup>                 | 29        |
| PtPdCu thin-film             | 76.2                                                    | 366.1 mA mg <sup>-1</sup> <sub>Pt</sub>  | 30        |
| PtPdCu concave nanooctahedra | 25.8                                                    | 529.5 mA mg <sup>-1</sup> <sub>Pt</sub>  | 31        |
| PtPdCu spherical network     | 86.9                                                    | 845 mA mg <sup>-1</sup>                  | 32        |
| PtPdCu nanowires             | 58.8                                                    | 535.3 mA mg <sup>-1</sup> <sub>Pt</sub>  | 33        |
| PtPdCu nanodendrites         | 75.0                                                    | 520 mA mg <sup>-1</sup> <sub>Pt</sub>    | 34        |
| PtPdCu porous nanocubes      | 50.0                                                    | 341 mA mg <sup>-1</sup> <sub>Pt</sub>    | 34        |
| PtPdCu cubic nanoframes      | 51.5                                                    | 455 mA mg <sup>-1</sup> <sub>Pt+Pd</sub> | This work |
| Commercial Pt/C              | 48.6                                                    | 177 mA mg <sup>-1</sup> <sub>Pt</sub>    | This work |

29. J. J. Mao, T. Cao, Y. J. Chen, Y. Wu, C. Chen, Q. Peng, D. S. Wang and Y. D. Li, *Chem. Commun.*, 2015, **51**, 15406–15409.
30. S. Jiang, B. Yi, Q. Zhao, H. Zhang, Y. Su, H. Yu, Z. Shao, *RSC Adv.*, 2016, **6**, 82370–82375.
31. M. X. Gong, X. Jiang, T. Y. Xue, T. Y. Shen, L. Xu, D. M. Sun and Y. W. Tang, *Catal. Sci. Technol.*, 2015, **5**, 5105–5109.
32. Y. Fan, Y. Zhang, Y. Cui, J. L. Wang, M. M. Wei, X. K. Zhang and W. Li, *RSC Adv.*, 2016, **6**, 83373–83379.
33. P. Wang, Y. Y. Zhang, R. Shi and Z. H. Wang, *New J. Chem.*, 2018, **42**, 19083–19089.
34. P. Wang, Y. Y. Zhang, R. Shi and Z. H. Wang, *ACS Appl. Energy Mater.*, 2019, **2**, 2515–2523.

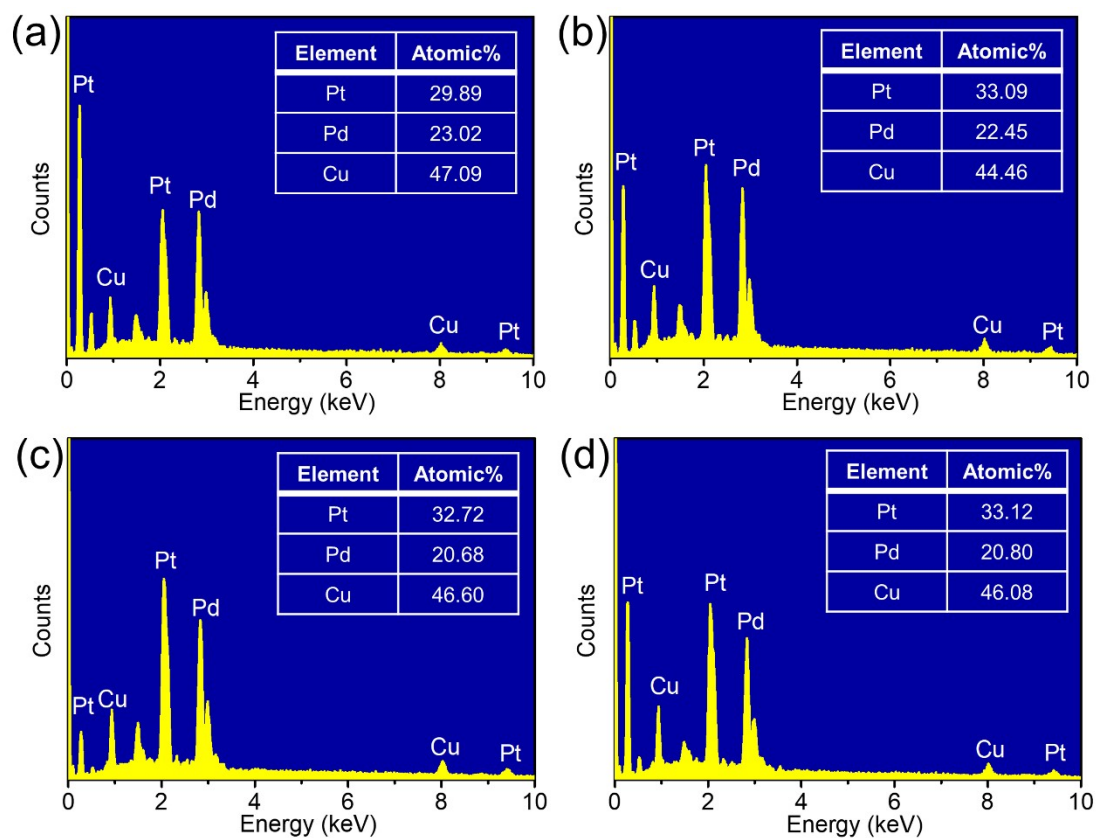

**Fig. S1** EDS spectra of the PtPdCu products obtained at different reaction time: (a) 10 min, (b) 50 min, (c) 120 min and (d) 160 min. These EDS spectra are obtained by a Bruker QUANTAX EDS on a Hitachi S-8100 field-emission scanning electron microscope.

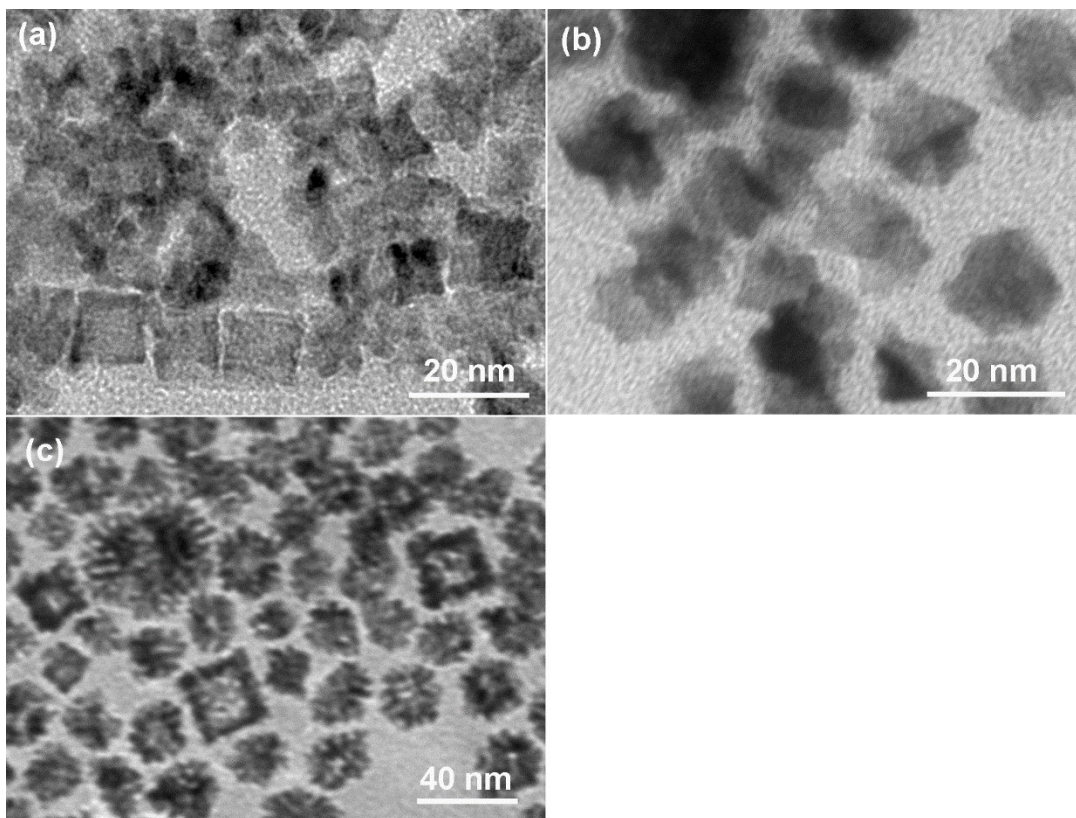

**Fig. S2** (a) TEM image of the sample prepared under the protection of  $N_2$  gas. During the synthesis process, the beaker was sealed by a plastic film, and the air in the beaker is purged by  $N_2$  gas. (b) TEM image of the sample prepared by replacing CTAB with CTAC (50 mg). (c) TEM image of the sample obtained by replacing CTAB with CTAC (50 mg) and KBr (19 mg).
